# Supplementary material
Source: publisher figshare collection journal article supplement (https://sage.figshare.com/ndownloader/files/14878064)
Supplement: Supplementary file 1 [file 14878064]

## [[APPENDIX TABLE]]

Table A.1.

Results from Multinomial Logit: Full Table

| Panel A: Employee level variables     |                                             |                                             |                               |                              |                              |
|---------------------------------------|---------------------------------------------|---------------------------------------------|-------------------------------|------------------------------|------------------------------|
|                                       | <i>Internal<br/>horizontal<br/>transfer</i> | <i>External<br/>horizontal<br/>transfer</i> | <i>External<br/>promotion</i> | <i>Internal<br/>demotion</i> | <i>External<br/>demotion</i> |
| <b>Education</b>                      |                                             |                                             |                               |                              |                              |
| Years of education                    | −0.02<br>(−0.30)                            | −0.03<br>(−0.56)                            | 0.07<br>(0.92)                | 0.16*<br>(2.33)              | 0.16<br>(1.79)               |
| Years of education <sup>2</sup>       | 0.01*<br>(2.55)                             | 0.01**<br>(2.93)                            | −0.00<br>(−0.86)              | 0.01**<br>(2.72)             | 0.01**<br>(2.86)             |
| <b>Work experience</b>                |                                             |                                             |                               |                              |                              |
| Experience up to one year (reference) |                                             |                                             |                               |                              |                              |
| 2–5 years                             | 0.47***<br>(6.71)                           | 0.48***<br>(5.20)                           | 0.00<br>(0.02)                | 0.52***<br>(4.56)            | 0.66***<br>(4.61)            |
| 6–15 years                            | 1.07***<br>(10.32)                          | 1.11***<br>(8.95)                           | −0.00<br>(−0.04)              | 1.67***<br>(12.00)           | 1.69***<br>(10.54)           |
| 16–25 years                           | 1.66***<br>(12.91)                          | 1.68***<br>(11.50)                          | −0.04<br>(−0.26)              | 2.70***<br>(15.96)           | 2.41***<br>(12.74)           |
| More than 25 years                    | 1.85***<br>(12.99)                          | 1.84***<br>(11.47)                          | −0.34*<br>(−2.11)             | 3.21***<br>(17.25)           | 2.57***<br>(12.39)           |
| Number of job functions to date       | 0.11***<br>(3.56)                           | 0.06<br>(1.71)                              | −0.03<br>(−0.65)              | 0.07*<br>(2.04)              | 0.19***<br>(4.09)            |
| Number of employers to date           | −0.06<br>(−1.51)                            | 0.16*<br>(2.42)                             | 0.18**<br>(3.11)              | 0.08<br>(1.58)               | 0.21**<br>(3.01)             |
| Years at function so far              | −0.04***<br>(−5.80)                         | 0.02*<br>(2.11)                             | −0.00<br>(−0.29)              | 0.01<br>(1.13)               | 0.04***<br>(3.35)            |
| Years at level so far                 | 0.01<br>(1.56)                              | 0.01<br>(0.74)                              | 0.02<br>(1.85)                | −0.03***<br>(−3.47)          | −0.04*<br>(−2.43)            |
| <b>Firm tenure</b>                    |                                             |                                             |                               |                              |                              |
| Tenure up to one year (reference)     |                                             |                                             |                               |                              |                              |
| 2–5 years                             | −0.25*<br>(−2.22)                           | −0.14<br>(−0.66)                            | −0.12<br>(−0.73)              | −0.19<br>(−1.66)             | −0.11<br>(−0.59)             |
| 6–10 years                            | −0.26*<br>(−2.09)                           | −0.31<br>(−1.34)                            | −0.30<br>(−1.56)              | −0.14<br>(−1.05)             | −0.33<br>(−1.77)             |
| 11–15 years                           | −0.08<br>(−0.55)                            | −0.10<br>(−0.41)                            | −0.52*<br>(−2.50)             | 0.03<br>(0.21)               | −0.12<br>(−0.54)             |
| More than 15 years                    | −0.20<br>(−1.27)                            | −0.44<br>(−1.49)                            | −0.94***<br>(−3.90)           | −0.28<br>(−1.65)             | −0.72**<br>(−2.83)           |
| <b>Prior performance</b>              |                                             |                                             |                               |                              |                              |
| Performance                           | −0.43***<br>(−5.24)                         | −0.97***<br>(−6.41)                         | −0.77***<br>(−5.47)           | −0.95***<br>(−8.85)          | −1.08***<br>(−7.29)          |

|                                 |          |          |         |          |          |
|---------------------------------|----------|----------|---------|----------|----------|
| Performance $t-1$               | 0.19**   | 0.17     | 0.29*** | 0.17*    | 0.25*    |
|                                 | (2.84)   | (1.37)   | (3.73)  | (2.08)   | (2.17)   |
| No prior promotions (reference) |          |          |         |          |          |
| 1 prior promotion               | 0.96***  | 0.92***  | -0.02   | 1.86***  | 1.80***  |
|                                 | (16.47)  | (13.46)  | (-0.26) | (22.38)  | (17.31)  |
| More than 1 prior promotion     | 1.45***  | 1.55***  | -0.07   | 3.04***  | 3.11***  |
|                                 | (12.03)  | (12.71)  | (-0.52) | (22.48)  | (18.27)  |
| No prior demotions (reference)  |          |          |         |          |          |
| 1 prior demotion                | -0.60*** | -0.77*** | 0.06    | -1.19*** | -1.30*** |
|                                 | (-7.44)  | (-11.63) | (0.41)  | (-10.47) | (-10.61) |
| More than 1 prior demotion      | -1.20*** | -1.47*** | -0.03   | -1.99*** | -2.50*** |
|                                 | (-8.21)  | (-12.64) | (-0.17) | (-11.27) | (-11.75) |
| <b>Other</b>                    |          |          |         |          |          |
| Relative wage                   | -0.12*** | -0.09*** | -0.01   | -0.25*** | -0.21*** |
|                                 | (-11.11) | (-9.08)  | (-1.17) | (-18.33) | (-15.43) |
| Relative wage growth            | -0.03**  | -0.03    | -0.03*  | -0.03    | -0.04*   |
|                                 | (-3.13)  | (-1.69)  | (-2.52) | (-1.55)  | (-1.99)  |
| Female                          | -0.64*** | -0.61*** | -0.06   | -1.12*** | -1.04*** |
|                                 | (-14.41) | (-12.57) | (-0.77) | (-13.84) | (-11.86) |

---

**Panel B: Job and firm level variables**

---

**Job characteristics**

|                                           |          |          |         |          |          |
|-------------------------------------------|----------|----------|---------|----------|----------|
| Clerical and expert jobs (reference)      |          |          |         |          |          |
| Managerial and professional jobs          | -2.13*** | -2.25*** | 0.24    | -4.55*** | -4.41*** |
|                                           | (-21.81) | (-24.25) | (1.46)  | (-31.08) | (-29.28) |
| Growing job (reference)                   |          |          |         |          |          |
| Stable job                                | -0.09    | -1.10*** | -0.21   | -0.12    | -0.46*** |
|                                           | (-1.17)  | (-7.66)  | (-1.86) | (-1.16)  | (-3.35)  |
| Shrinking job                             | -0.05    | -1.75*** | -1.10** | -0.10    | -0.70**  |
|                                           | (-0.35)  | (-4.35)  | (-2.76) | (-0.77)  | (-2.90)  |
| Research and development (reference)      |          |          |         |          |          |
| Business management and development       | 1.64***  | 0.71***  | 0.59**  | 0.99***  | 1.51***  |
|                                           | (7.32)   | (3.35)   | (2.71)  | (3.67)   | (3.74)   |
| Quality control                           | 0.61***  | -0.07    | 0.18    | 0.35     | 0.04     |
|                                           | (4.11)   | (-0.45)  | (1.05)  | (1.83)   | (0.18)   |
| Manufacturing                             | 0.11     | -0.06    | -0.09   | 0.11     | -0.02    |
|                                           | (0.68)   | (-0.33)  | (-0.48) | (0.63)   | (-0.11)  |
| Construction                              | -0.19    | 0.30     | 0.36    | -0.17    | 0.03     |
|                                           | (-0.87)  | (1.12)   | (1.49)  | (-0.58)  | (0.12)   |
| Transport and storage                     | 0.43**   | -0.54**  | -0.11   | 0.10     | -0.33    |
|                                           | (3.23)   | (-2.58)  | (-0.35) | (0.53)   | (-1.38)  |
| Information and communications technology | 0.58***  | -0.11    | -0.13   | -0.14    | 0.08     |
|                                           | (3.97)   | (-0.50)  | (-0.68) | (-0.75)  | (0.30)   |
| Maintenance and repair                    | 0.42*    | -0.12    | 0.14    | 0.36     | 0.25     |
|                                           | (2.26)   | (-0.43)  | (0.58)  | (1.47)   | (0.59)   |

|                                       |         |         |          |         |          |
|---------------------------------------|---------|---------|----------|---------|----------|
| Purchases                             | 0.59*** | −0.20   | 0.02     | 0.07    | 0.36     |
|                                       | (3.45)  | (−1.22) | (0.09)   | (0.27)  | (1.50)   |
| Sales and marketing                   | 0.57*** | 0.15    | 0.02     | 0.58*** | 0.50*    |
|                                       | (3.99)  | (1.06)  | (0.11)   | (3.73)  | (2.52)   |
| Communication                         | 0.16    | −0.13   | −0.28    | 0.46    | 0.84*    |
|                                       | (0.66)  | (−0.58) | (−1.18)  | (1.55)  | (2.26)   |
| Law, insurance and tax affairs        | −0.39   | −0.46*  | −0.01    | −0.29   | −0.34    |
|                                       | (−1.52) | (−2.22) | (−0.05)  | (−0.74) | (−0.60)  |
| Environmental management              | 1.13*** | 0.00    | 0.20     | 0.56    | 0.47     |
|                                       | (4.22)  | (0.01)  | (0.50)   | (1.46)  | (0.85)   |
| Financial management                  | 0.17    | −0.03   | 0.43*    | 0.21    | 0.41     |
|                                       | (1.36)  | (−0.16) | (2.39)   | (1.05)  | (1.90)   |
| Administration services               | −0.34*  | −0.22   | 0.09     | 0.07    | −0.07    |
|                                       | (−2.49) | (−1.25) | (0.37)   | (0.32)  | (−0.30)  |
| Personnel management                  | 0.30*   | −0.05   | 0.45*    | 0.09    | 0.63**   |
|                                       | (2.26)  | (−0.30) | (2.34)   | (0.43)  | (2.62)   |
| Occupational health care and security | 0.52    | 0.06    | 0.22     | 0.61    | 0.68     |
|                                       | (1.68)  | (0.16)  | (0.59)   | (1.42)  | (1.42)   |
| Corporate security                    | 0.61    | −0.49   | −1.01*   | 0.45    | −0.07    |
|                                       | (1.92)  | (−1.54) | (−2.10)  | (1.28)  | (−0.12)  |
| <b>Firm characteristics</b>           |         |         |          |         |          |
| Firm size smaller than 50 (reference) |         |         |          |         |          |
| 51–100                                | 0.06    | 0.17    | −0.24    | 0.21    | −0.10    |
|                                       | (0.36)  | (0.78)  | (−1.25)  | (0.92)  | (−0.45)  |
| 101–200                               | 0.03    | −0.20   | −0.69*** | −0.13   | −0.45*   |
|                                       | (0.17)  | (−0.88) | (−3.85)  | (−0.67) | (−2.22)  |
| 201–500                               | 0.44**  | −0.32   | −0.91*** | 0.10    | −0.74*** |
|                                       | (3.05)  | (−1.40) | (−4.85)  | (0.50)  | (−3.74)  |
| 501–1,000                             | 0.73*** | 0.41    | −0.74**  | 0.56*   | −0.32    |
|                                       | (4.06)  | (1.23)  | (−2.86)  | (2.09)  | (−1.03)  |
| 1,001–2,000                           | 0.20    | −0.75   | −1.91*** | 0.02    | −1.76*** |
|                                       | (1.03)  | (−1.91) | (−6.12)  | (0.07)  | (−6.19)  |
| More than 2,000                       | 0.44**  | −1.04** | −2.10*** | −0.34   | −2.32*** |
|                                       | (2.64)  | (−2.60) | (−5.96)  | (−1.45) | (−6.94)  |
| Industry indicators                   | Yes     | Yes     | Yes      | Yes     | Yes      |
| Year indicators                       | Yes     | Yes     | Yes      | Yes     | Yes      |
| Observations                          | 86,563  |         |          |         |          |

Notes: Estimated coefficients are reported, with *t*-statistics in parentheses. The baseline category of the dependent variable is internal promotion. The dependent variable is a transition between year *t* and *t*+1, and the individual-level variables are measured at year *t*. Relative wage and wage growth are calculated within job-function/level/firm/year-cells. The job and firm-level variables refer to the destination job (i.e., they are measured at year *t*+1). Growing, shrinking, and stable jobs are indicators for whether employment in the job function/level/firm-cell increases, decreases, or is unchanged between years *t* and *t*+1.

\*  $p < 0.05$ ; \*\*  $p < 0.01$ ; \*\*\*  $p < 0.001$ .
